# Supplementary material for: Adult Hereditary White Matter Diseases With Psychiatric Presentation: Clinical Pointers and MRI Algorithm to Guide the Diagnostic Process
Source: Atypon-hosted journal article supplement (doi:10.1176/appi.neuropsych.20110294), 2021-05-06
Supplement: appi.neuropsych.20110294.ds001.pdf [file appi.neuropsych.20110294.ds001.pdf]

**Supplemental Table S1.** Search terms used for each of the sixteen identified adult genetic leukoencephalopathies in combination with the following terms added to every search: AND ((neuropsychiatric OR psychiatric OR behavioral OR behavioural OR psychosis OR mood) AND (onset OR diagnosis OR presentation OR disturbance OR changes OR manifestations)).

| Genetic leukoencephalopathy                          | Search terms                                                                                                                                                                                                                                                                   | Articles found | Pertinent literature |
|------------------------------------------------------|--------------------------------------------------------------------------------------------------------------------------------------------------------------------------------------------------------------------------------------------------------------------------------|----------------|----------------------|
| ALSP (HDLS + POLD)                                   | ((“adult-onset leukodystrophy” OR “adult-onset leukoencephalopathy” OR “pigmentary orthochromatic leukodystrophy” OR “hereditary diffuse leukoencephalopathy with spheroids” OR CSF1R)) AND (“neuroaxonal spheroids” OR spheroids OR “axonal spheroids” OR “pigmented micro*”) | 41             | 32                   |
| AARS2-Related Leukoencephalopathy                    | (AARS2-related ovarioleukodystrophy) OR (AARS2-Related Leukoencephalopathy) OR ((AARS2 AND (leukoencephalopathy OR leukodystrophy))                                                                                                                                            | 7              | 7                    |
| Adult-onset Alexander's Disease                      | ("Adult-onset Alexander's Disease") OR ("AOAD")                                                                                                                                                                                                                                | 5              | 4                    |
| ADLD (autosomal dominant leukodystrophy)             | (ADLD) OR (autosomal dominant leukodystrophy) OR (LMNB1-Related) OR (LMNB1)                                                                                                                                                                                                    | 28             | 7                    |
| Dentatorubral-Pallidolusian Atrophy                  | ((“Dentatorubral-Pallidolusian Atrophy” OR DRPLA OR “Haw River Syndrome” OR “Naito–Oyanagi disease”))                                                                                                                                                                          | 171            | 19                   |
| POLR3-related leukodystrophies                       | ((“POLR3-Related Leukodystrophy”) OR (“4H syndrome”) OR (“Hypomyelination hypogonadotropic hypogonadism hypodontia syndrome”))                                                                                                                                                 | 7              | 7                    |
| Vanishing White Matter Disease                       | ((“Leukoencephalopathy with vanishing white matter”) OR (“eIF2B-related disorders”) OR (“vanishing white matter disease”) OR (VWMD))                                                                                                                                           | 13             | 9                    |
| Cerebrotendinous xanthomatosis                       | (Cerebrotendinous Xanthomatosis) OR (cerebral cholesterinosis) OR (CTX) OR (sterol 27-hydroxylase deficiency)                                                                                                                                                                  | 406            | 51                   |
| Metachromatic Leukodystrophy                         | ((Metachromatic Leukodystrophy) OR (MLD) OR (ARSA deficiency))                                                                                                                                                                                                                 | 301            | 70                   |
| X-linked Adrenoleukodystrophy (AMN-cerebral subtype) | (X-linked adrenoleukodystrophy) OR (X-ALD)) OR (“ABCD1 gene”)                                                                                                                                                                                                                  | 152            | 69                   |
| CADASIL                                              | (CADASIL) OR (Cerebral autosomal dominant arteriopathy with subcortical infarcts and leukoencephalopathy)) OR (NOTCH3 gene)) OR (NOTCH3)                                                                                                                                       | 284            | 111                  |
| CARASIL                                              | (CARASIL) OR (Maeda syndrome) OR (Cerebral autosomal recessive arteriopathy with subcortical infarcts and leukoencephalopathy)                                                                                                                                                 | 11             | 6                    |

|                                                                                                        |                                                                                                                       |    |    |
|--------------------------------------------------------------------------------------------------------|-----------------------------------------------------------------------------------------------------------------------|----|----|
| CARASAL                                                                                                | ((Cathepsin A-related arteriopathy with strokes and leukoencephalopathy) OR (CARASAL) OR (CTSA gene) OR (CTSA))       | 54 | 1  |
| Globoid Cell Leukodystrophy (Krabbe disease)                                                           | ("Globoid Cell Leukodystrophy" OR "Krabbe Disease")                                                                   | 37 | 14 |
| late-onset GM2 Gangliosidosis (Sandhoff and Tay Sachs disease)                                         | (late-onset GM2 Gangliosidosis) OR (Sandhoff disease) OR (Tay Sachs disease)                                          | 75 | 22 |
| Pelizaeus-Merzbacher disease (x-linked spastic paraplegia)/ Pelizaeus-Merzbacher disease-like disorder | ("Pelizaeus-Merzbacher disease-like disorder") OR ("Pelizaeus-Merzbacher disease") OR ("x-linked spastic paraplegia") | 39 | 18 |
